# Supplementary material for: Positional cloning of rp2 QTL associates the P450 genes CYP6Z1, CYP6Z3 and CYP6M7 with pyrethroid resistance in the malaria vector Anopheles funestus
Source: PubMed Central journal article supplement — Heredity (Edinb). 2012 Sep 5;109(6):383–92. doi: 10.1038/hdy.2012.53 (PMC3499844; doi:10.1038/hdy.2012.53), 2012-09-05
Supplement: hdy201253x1.pdf [file hdy201253x1.pdf]

CYP6N1 -----MWIN-----LLVLVLLVAVFVWVQRFYSYWKRRNIPYITPSFPQGNLTGVGK-KRHM 50  
CYP6N2 -----MLIY-----LLLIAVSAAVVHVKRYSFVWDRGVPYVQPRFPFGNIQGIGR-RMHS 50  
CYP6M1a MWFLTIEAL---VAVLALLGGLVYLVKRQSYWKDRNVPHPS~~TTF~~FLGSFKDAGT-KMHF 56  
CYP6M1c MWFLFVEIL---VALVALLGGLVYLVKRQSYWKDRNVPHPS~~PAFF~~FGSFKDGTGT-KIHF 56  
CYP6M1b MWFLSLEAF---VALLVLLGALVYFIVRKQSYWKDRKVPHPSP~~TFL~~IGSFKDAFS-KVHF 56  
CYP6M7 --MEPLDIL---ISVLMVCFGVYLLIDRRFQYWTNRNV~~PQ~~SKPELVFGNVREVSQ-TIHL 54  
CYP6M4 --MEFTDVA---ITLGMLCIILYLLVRRFQYWTERNV~~PQ~~LKPELLFGDAREVGK-VCHI 54  
CYP6M8 -MLSLEFDT---FLVAALVAGLYYYLDRKRSYWKDRD~~VPG~~PKGELLGNGFGKVGK-KEHI 55  
CYP6Y1 MYLQVVG-----ILVAVVVTCLAWIKRRYQYWKARS~~VAF~~IAPEFPYGNFGLTGK-LEHI 53  
CYP6Y2 MELVVASLVSLGAILATFCLGVYLFVTRKYSFWRAH~~NVP~~YVEPELPGNFKEMGK-SIHP 59  
CYP6S1 --MFVHLLL---VASLALLWIYLHFKRYLFWLKR~~DVP~~YLEPTFPVGNVVDIFSPTIHF 54  
CYP6S2 --MLIPAVL---VACFGLVWLYIHFKRRLFWLKR~~DVP~~YLEPTFPVGNVVDIFSPTIHF 54  
CYP6R1 --MLPVLWLLLLTVSSEFLTFLMCV~~IHIR~~KKYSFWREL~~GV~~PIPAS~~FPL~~GNIQHTSH----- 53  
CYP6Z1 -----MILY-----AIAVLPVIVFLALKYVYSY~~WDR~~HGIPNLKPEIPYGNLRILAEKKESL 51  
CYP6Z3 -----MFVY-----TLALFPIVIFLLRLYI~~YSH~~WERYGLPHVKPEIPYGNLRTVVEKKESF 51

CYP6N1 SAILQNCYKQLKSSGQS-YGGIYFFINPVALLIDPEL~~IKV~~VLVKDFPYFHNRLNLYNDRD 109  
CYP6N2 SQLMTKFFYNELKPSGRS-FGGIYFFTNPVALALE~~LDF~~VKNVLRDFAHFHDRGVYNEKD 109  
CYP6M1a SDYLEQYYTTYK-GKHP-FTGAYMLISPIVLP~~TDE~~LVKSIILVKDFQYFHDRGTYTYNEKH 114  
CYP6M1c TEYLEQYYTTYK-GKHP-FMGLYMLVSPIVLP~~TDE~~LVKSIIFVRDFQYFHDRGTYTYNEKD 114  
CYP6M1b SEYLEQYYTTYK-GKLP-FMGVYMLVSPVIV~~TDE~~LVKSIILVRDFQYFHDRGTYHNEKH 114  
CYP6M7 ADKFREIYNELK-GKHP-LVGVYLF~~FKP~~VALITDLELLKCVFVKDFQYFHDRGTYTYNEKH 112  
CYP6M4 GEKIHQLYNELK-GKHP-FGGIYLF~~TKP~~VALITDLELLKCVFVKDFQYFHDRGTYTYNEKH 112  
CYP6M8 TVPMKKIYDENK-GKHP-FAGIYQF~~VK~~PVALITDLELLKCVFVKDFQYFHDRGTYFYNERD 113  
CYP6Y1 APITQRHYNFYQQLKVP-YGGVFM~~LTP~~LLYIFD~~TK~~LKIKTL~~LV~~KDFHYFPN~~RG~~VYFNERD 112  
CYP6Y2 AHL~~SQR~~FYEQYKSD~~EG~~PGFVGLYIFVNPV~~LL~~VLTN~~LR~~LAKRILIED~~FHH~~FPDRGVYNEKD 119  
CYP6S1 AHIIEKLYKKLK-SRGD-YVGIYFFRDPV~~LL~~VLS~~PDF~~ARTIILVKDFNYFVDRGVYSNEEV 112  
CYP6S2 AHLIEKLYRRLK-GRGD-YAGIYFFRDPV~~LL~~VLS~~PDF~~ARTIILVKDFNYFVDRGVYSNEEV 112  
CYP6R1 --LMVELYQELK-GKHP-FGLGFQ~~FTE~~PVALITDPE~~MV~~KNVLRD~~CR~~FFYDRGGYTDGKH 109  
CYP6Z1 NIAVN~~NLY~~TRST----DRLVGVYLF~~FR~~PA~~IL~~IRDAHLAKRIMV~~NDF~~QH~~FH~~DRGVYCNEHG 107  
CYP6Z3 GIAIN~~NLY~~HRSS----DRL~~L~~GVYLF~~FR~~PA~~IL~~IRDPQLAKRIMV~~NDF~~QH~~FH~~DRGVYCNEKG 107

CYP6N1 DPLSHHLVAMEG~~TKWR~~NLRAKLTPTFTSGMKLM~~FST~~VTA~~VAE~~QFHKCMAEEIRHS-SV 168  
CYP6N2 DPISGHLFNI~~E~~G~~TKW~~TNLRK~~KL~~IPTFSSGKMK~~MM~~CPTIVSVGGRF~~RE~~CLERCIAND-GEV 168  
CYP6M1a DPLTTHLFN~~LEG~~QK~~W~~KNL~~R~~NKLTPTFTSGKMK~~MM~~FPTVVAAGKQLKEFMDENVQKN-SEL 173  
CYP6M1c DPLTAHLFN~~LEG~~QK~~W~~KNL~~R~~NKLTPTFTSGKMK~~MM~~FPTVVAAGKQLKEFMDENVQKN-SEL 173  
CYP6M1b DPLTAHL~~SN~~LEGQ~~R~~W~~K~~HL~~R~~NKLSPTFTSGKMK~~MM~~FPTVVAAGKQLKEFMDENVQKN-SEL 173  
CYP6M7 DPLTAHLFN~~IE~~GQK~~W~~KNL~~R~~NKLSPTFTSGKMK~~MM~~FPTIIAAGKQ~~FK~~DFMEETVHEQ-VDF 171  
CYP6M4 DPMSAHLFN~~IE~~GQK~~W~~KNL~~R~~NKISPTFTSGKMK~~MM~~FPTIVAAGKQ~~FK~~NYMEDTIQQQ-GEQ 171  
CYP6M8 DPLSAHLFN~~IE~~GQK~~W~~RS~~L~~RNKLSPTFTSGKMK~~MM~~FPTIVTAGKQ~~FK~~DFMEETVKRE-NVF 172  
CYP6Y1 DPLSAHMFA~~IE~~GQK~~W~~RTL~~R~~AKLSPTFTTGRIK~~MT~~LPLVKEVC~~QR~~FC~~DH~~LHQSLQTS-AEV 171  
CYP6Y2 DPLSAHLFA~~IE~~GQ~~R~~W~~K~~DL~~R~~AKITPTFTSGRMKA~~AF~~PLVLDIAE~~Q~~FCDFLRERYTSS-DMV 178  
CYP6S1 DPLSANLFF~~ME~~GNR~~R~~W~~R~~KLSK~~L~~APTFTSGK~~L~~KAMFHTIVDVGNRLDQYLAERC~~NQ~~E-QRL 171  
CYP6S2 DPLSANLFF~~MD~~GNR~~R~~W~~R~~KLSK~~L~~APTFTSGK~~L~~KAMFHTIVDVGNRLDQYLADRCIRL-QRI 171  
CYP6R1 DPLTGHMLN~~SE~~SER~~CA~~L~~H~~HAASPIFSTGRIRAF~~L~~PV~~M~~LEKLNHFREYLN~~G~~KVNTEG~~TK~~V 169  
CYP6Z1 DPMSANL~~F~~ALPG~~Q~~R~~W~~KNL~~R~~GKLTPTFTSGQLRN~~M~~LPTFLDVGK~~KL~~QQ~~F~~LDN~~L~~AMDH-QIV 166  
CYP6Z3 DPFSANL~~F~~ALSG~~D~~R~~W~~KNL~~R~~AKLTPTFTSGQLRN~~M~~LPTLIDVGS~~KL~~NDRMNTLADEK-TVV 166

CYP6N1 EMKDLLARF~~TT~~DVIGSVA~~F~~GLECN~~S~~LQDPDAE~~F~~FRVMGRK~~V~~FQSSPYRA-LK~~L~~FLAAQ~~F~~PH 227  
CYP6N2 EMKELLARF~~TT~~DVIGTCAF~~G~~IDCNSLNDPNAE~~F~~LRMGRK~~V~~FVPRGRI-LK~~F~~FFMAT~~F~~KD 227  
CYP6M1a EMKDIMARF~~TT~~DVIGTCAF~~G~~IECN~~S~~MRDPNAE~~F~~FRAMGK~~L~~FVERQPSQ--FVNIMVQ~~F~~SHK 231  
CYP6M1c EMKDIMGRF~~TT~~DVIGTCAF~~G~~IECN~~S~~MRDPNAE~~F~~FRAMGK~~Q~~FIDRQPSQ--FVNLMVQ~~F~~STK 231  
CYP6M1b EMKDIMARF~~TT~~DVIGTCAF~~G~~IECN~~S~~MRDPNAE~~F~~FRAMGK~~Q~~FVDRPPSQ--FVNLMIQ~~V~~SPK 231  
CYP6M7 ELKDV~~M~~ARF~~TT~~DVIGMCAF~~G~~IECN~~S~~MSNPDAE~~F~~FRVMGRKIFARPRGK--V~~K~~SLVINSMPR 229  
CYP6M4 ELKDV~~L~~ARF~~TT~~DIIGTCAF~~G~~IECN~~S~~MRDPDAK~~F~~FRVMGRKIFTRTRGT--LQQLLMNA~~F~~P 229  
CYP6M8 ELKDLLARF~~TT~~DVIGMCAF~~G~~IECN~~S~~MRNPDAE~~F~~FRAMGRKIFEISPGT--FK~~T~~M~~L~~MNGMPS 230  
CYP6Y1 EMHDL~~L~~SRYTIDVIGACAF~~G~~IECN~~S~~FRDPNE~~F~~FRY~~G~~KIAFDKLRHSP-LV~~V~~YLMKA~~F~~FRK 230  
CYP6Y2 EVRDL~~M~~ARF~~TT~~DVIGSYA~~F~~GLECN~~S~~FRDPQNE~~F~~FRIGRKH~~F~~DTPRNHP-LK~~V~~FIMK~~T~~FRG 237  
CYP6S1 DIKELLARF~~L~~TDVIGSCAF~~G~~IDCNSIDNPNSQ~~F~~FRVMGRMINLPK~~L~~KA-LK~~V~~FFAMM~~F~~FRK 230  
CYP6S2 DIKELLARF~~M~~TDVIGSCAF~~G~~IECN~~S~~LDNPNSQ~~F~~FRLMGK~~R~~MINLPK~~L~~KA-LK~~V~~FFAMM~~F~~FRK 230  
CYP6R1 ELKEMIG~~K~~LN~~T~~DIAM~~S~~FVLGIEGN~~L~~IAPDGLHEALMREA~~F~~LLPNV--AK~~L~~FLM~~T~~CYRS 227  
CYP6Z1 NMRDIVSRYVLDVVASV~~F~~FGFEANCLHDPDD~~P~~FRVALRDL~~T~~NPESFLNNIR~~S~~AGVFLCPG 226  
CYP6Z3 DMRDIASRFVLD~~T~~IASV~~F~~FGFEANCIHNSDD~~P~~FLK~~T~~LLQV~~N~~KRRSFVDNIR~~T~~SGV~~F~~ICPG 226

CYP6N1 IARAFHVTLTLPEVANFFFTGVVNDTIDFRKTNNVQ--RNDFMTLLMKILKEQEESGSIDD 285  
CYP6N2 FSRRIHIGKTSEDVVSQFFFKVVRETIEYREQHNIQ--RNDFMNLLMQLN----SGQLDD 281  
CYP6M1a LSRMLGIRLIDKEVSTFFFLKVVKDTIDYRVKNSIQ--RNDFMDLMIRMLQN-----TEN 283  
CYP6M1c LSRMMGIRLIDKEVSTFFFLKVVKDTIDYRVKNGIQ--RNDFMDLMIRMLQN-----TEN 283  
CYP6M1b LSRMMGIRLIDKEVSTFFFLKVVKDTIDYRVKNSIQ--PNDFMDLMIRMLQN-----TEN 283  
CYP6M7 LAKLIGLRTLDPVEVSDFFMKAVRDTIKYRVENNVQ--RNDFMDILIRMRSDK----ETKS 283  
CYP6M4 VAKMVGIKLIVPEVSDFFMKVVRDTIKYRVENNVQ--RNDFMDILIRMRSDK----ETKS 283  
CYP6M8 LAKMLRMKQTDQDVSDFFMNAVRDTINRVANKVK--RNDFVLLITMMSKD----ETKS 284  
CYP6Y1 HANALGMKQLHDDVSSFFMRVVKDTIEYREREQIV--RNDFMDLLLKLKNTG-----RLES 284  
CYP6Y2 LANRLGLKLLHDDVATFFQSVIRQTIHRERHGIG--RSDFLDLLIRLKNKG-----SLEG 291  
CYP6S1 QARALGIRFNDKDVSDFFLTVVRDTIRYREENNVR--RDDFMQLLIDMMKQD----GVGA 284  
CYP6S2 QAQLLGIRYNDKDVSEFFMNVVRDTIRYREEKGVV--RDDFMQLLIDMMKQD----GTGA 284  
CYP6R1 MAKKMRLKMFNSNYITELFQQVVRETIEHRKDISYLNRRDLDLIDQLLAMPGFD-----GK 281  
CYP6Z1 LLKFTGISALAPAMKKFTMEVIVSSHLHQRETGQVT--RRDFIQMLTDLRRNAG-----NN 279  
CYP6Z3 LLKLTGLTSLPTELINFVMEIITHQIDHREKNQIS--RKDFVQLLIDLRRDAS-----SQ 279

CYP6N1 G--QKDHLTLDDIAAQAFVFFLAGFETSSTAMSFCLYELALHQDLQDKARQNITEVLKKY 343  
CYP6N2 SGETVVKLSLNEIVAQAQFVFFLGGFETSSTTMSYCLHELALNEQIQQRARQCVLDAVKKH 341  
CYP6M1a PEE---SLTFNEVAAQAQFVFFFAAGFETSSTLLTWTLYELALNPEIQEKGRQCVEILEKH 340  
CYP6M1c PEE---SLTFNEVAAQAQFVFFFAAGFETSSTLLTWTLYELALNPEIQEKGRQCVEILEKH 340  
CYP6M1b PEE---SLTFNEVAAQAQFVFFFAAGFETSSTLLTWTLYELALNPEIQEKGRKCVKEILEKH 340  
CYP6M7 DDG---TLTTNEIAAQAFVFFLAGFETSSTLLTFTLYELALNQDAQDKGRRCVKEVLERH 340  
CYP6M4 DDG---TLTTNEIAAQSFVFFLAGFETSSSLMTFTLYELALNPEIQEQARNVCVEVLDY 340  
CYP6M8 DDE---SLTFNEIAAQAFVFFLAGFETSSTLLTWTLYELALNPEVQEQGRKCVREVLLKH 341  
CYP6Y1 GGEDLGRLTFFEEIAAQAFIFFTAGYDTSSTAMTYTLYELALKQDVQDKARQCVKETLQY 344  
CYP6Y2 SNEIVGRLSGDEIAAQAFIFFTAGFETSSSAMTYTLYELALNQELQQRARDCVMDALEKH 351  
CYP6S1 GEC----LTFEEIAAQAFVFFFAAGFETSSTTTITCALHLLAKHPEVQNEARKCIRETLIKH 340  
CYP6S2 GEA----LTFEEIAAQAFVFFFAAGFETSSTTTITCALHLLAKHPKAQRKARACVRSVLAKH 340  
CYP6R1 S-----TLTLSQMAAVFLFLGA-YDATGITTFCLYELAQRPVQERARACVLEALEKH 335  
CYP6Z1 AED---SLSEAQCAANVFLFYAAGADTSTAASFTLHELTHNPEVMGKVQREIDEMMNRY 336  
CYP6Z3 GEQ---ALSIEQCAANVFLFYIAGSETSTAASFTLHELSHNPDALAKLQQEIDEMMERH 336

CYP6N1 D-SISYEALHEMKEYIDMCINESLRKYPPATTLTRRVEKDYRVPGT-DQVLQKGMVAIPV 401  
CYP6N2 G-GLSYEALMDMPYIDQCINESLRKYPPGANLIRQVSQDYRVPGT-DVTFPKGMNVMIPV 399  
CYP6M1a NGEMTYEAILDMKYLDQILKEALRKYPPLPIHIRVAKQDYRVPNT-DSVIEAGTLVLVPI 399  
CYP6M1c NGEMTYEAILDMKYLDQILKEALRKYPVPMHFRTAAQDYHVPNT-DSII EAGTMILTPT 398  
CYP6M1b NGEMTYEAILDMKYLDQILNEALRKYPVPMHFRTTQDYHVPNT-DSII EAGTRVLIPT 399  
CYP6M7 NGELTYDAVMEMHYLDQILKESLRKYPPVPHFRITTSKEYQVPGT-KTVLEAGTSVMVPV 399  
CYP6M4 GGELTYEAALEMDYLDLDRVLKECLRKYPVSVHFRTAKDYLVPGT-NSILERGTSMVMPV 399  
CYP6M8 NGEMSYDAVVDMKYLDQILNESLRKYPPVPHFRVASKDYQVPGT-KSVLEAGTAVMVPV 400  
CYP6Y1 DGKLSYEAVSDMSYLDQCINETLRKHPPVAILERNADKDYRLPDS-GLLLRGQKIMIP 403  
CYP6Y2 AGVLSYESKMNLYLDQCIYETLRKYPPVAILERTVAKPYRLSDT-NIVLHRGMKIMIPA 410  
CYP6S1 NNLLSYDAVMEMEYIGWIINETLRMYPPVATLHRITTPYQLPN--GAVLPEGIGVILPN 398  
CYP6S2 GNQLTYEAITEMDYIECIINETLRLYPPVATIHRMTSQPYQLPN--GKILPVGVGVII SN 398  
CYP6R1 D-GITYDALADMPYIDQCLNETLRMHPLAINLVRVVTKNYPVPDASGVVLPKGLNIVVVP 394  
CYP6Z1 NGEITYDNITELKYLDMCIKETLRMYPALAVLNRECTIDYVPVDS-DIIIRKGTQVI IPL 395  
CYP6Z3 NGEITYENINELKYLDLCVKEETLRKYGPLPILNRECTIEYAVPDS-DVIVIRKGTQVI IPL 395

CYP6N1 YALQHDPDHFNPNERFDPERFTPEQSEKRHPFTFLPFGEGRVCIIGLRFGMVQARIGLVY 461  
CYP6N2 YAIHHDPEHYDPERYDPDRFAADASEARKPYSFIPFGEGRICIAARFGMLEARVGLSV 459  
CYP6M1a YAIQRDPDIFPEPEKFDPERFSPEEEAKRHPPFAWIPFGEGRVCIIGLRFGMMQARIGLAY 459  
CYP6M1c FAIQRDPDIFPEPEKFDPERFSPEEEAKRHPPFAWIPFGEGRVCIIGLRFGMMQARIGLAY 458  
CYP6M1b FAIQRDPDIFPEPEKFDPERFSPEEEAKRHPPFAWIPFGEGRVCIIGLRFGMMQARIGLAY 459  
CYP6M7 YAIHRDPEHFNPDLDFDRFTPEEEAKRHPPYAWTIPFGEGRICVGLRFGMMQARIGLAY 459  
CYP6M4 LGIHRDAEHFNPNERFDPERFTPEQEAKRHPYAWTIPFGEGRICVGLRFGMMQARIGLIH 459  
CYP6M8 HAIHHDPAVFPDPERYDPERFSPEQEAKRHPYAWTIPFGEGRICVGLRFGMMQARIGLAY 460  
CYP6Y1 YAMHHDSTHFDPDEQYRPERFSPAQVAKRDPYCYLIPFGEGRICIGMRFGSLQAKMGLAS 463  
CYP6Y2 YAIHHDPIYPNPATYDPERFTPERMARRDPCAYLIPFGEGRICIGLRFGMMQARIGLAL 470  
CYP6S1 LAFQNDPDYFNPDRDFKPERFSIKNDFKNN-FSYLIPFGEGRICIGMRFGLLQTRLGLAM 457  
CYP6S2 LAFHHDPTYFNPDRDFKPERFEDKAFGKNN-PSYLIPFGDGPRMCIAMRFGQLQTRLGLAM 457  
CYP6R1 YAIHYDPQYYPEPERFDPERFLPEACRQRTPYTFLIPFGVGPSCIGYRQGKIQLRAMMAV 454  
CYP6Z1 LGISMNEKYFPNPELYSPERFD-EATKNYDADAYYIPFGVGPSCIGLRQGLLSKIALVL 454  
CYP6Z3 LLSISMNEKYFPNPELYSPERFD-EATKNYDADAYYIPFGVGPSCIGLRQGVLVSKIGLVL 454

|         |                                                               |     |
|---------|---------------------------------------------------------------|-----|
| CYP6N1  | LLKHFRFTLATDKTSVPLKITPSSTILTIDGGLWLNVEKL-----                 | 501 |
| CYP6N2  | LLMHFSFTRCS-KTNVPLVISSRHAVLTPEGGLWLKVEKLQA-----               | 500 |
| CYP6M1a | LLQGF <sup>g</sup> SFAPYE-KTSVPMKFVTNNILLSPKDGLWLKVNKL-----   | 498 |
| CYP6M1c | LLQGF <sup>g</sup> SFAPYE-KTSVPMKFVTNSEMLAPRDGLWLKVNKL-----   | 497 |
| CYP6M1b | LLQGF <sup>g</sup> SFTPYE-KTSVPKKFIKNNIFLSPKDGLWLKVNKL-----   | 498 |
| CYP6M7  | LLTGFRFVPGA-KTMVPMKLDVKSFILSPQGGGLWLKVEKLST----               | 500 |
| CYP6M4  | LLTSFRFACCS-KTPIPMKFDITNTILSPKGGMWLRMEKLTkdCE-                | 503 |
| CYP6M8  | LLDGFQFAPSS-KTVIPMELSTESFIMAPKGGGLWLKVDKI-----                | 499 |
| CYP6Y1  | MLDRFQFSTCE-RTQIPVQYSRTNFILGPANGVWLRAEEL-----                 | 502 |
| CYP6Y2  | LLKHFQVLPCK-ETDEPLTYSTQAFVLT <sup>g</sup> VPVNGVRLRLAKYELNEP- | 514 |
| CYP6S1  | LVRNYNFTIDPSDAERPLRIDPINLLHGPAgevWLNvKRIVDM---                | 500 |
| CYP6S2  | LLRNYNFAIDDCDADRPLLIDPINLMHGPAgevWLNvERTVEKNS-                | 502 |
| CYP6R1  | LLSSYEFTKCP--NITQGSRSKAHTVLKLDGDLWLNvKPINRTNDD                | 498 |
| CYP6Z1  | MLTKFVFSATI---PRKLCFEPVAVTLAPKGGFPMRIERV-----                 | 492 |
| CYP6Z3  | LLSKYNFHATI---PAKVKFAAINVGLTPEVGLPMRIEHRK-----                | 492 |

**Figure S1.** Alignment of the amino acid sequences of fifteen *An. funestus* CYP6 P450 proteins from the *rp2* BAC clone. The sequences were aligned using ClustalW. The membrane targeting/anchor hydrophobic N-terminal region is in bold and underlined. The conserved C-helix WxxxR motif is in green while the other conserved ExLR and PERF motifs are highlighted in yellow and grey. The haem-binding loop (P450 signature sequence) is highlighted in dark grey with the cysteine residue involved in haem coordination is in bold and underlined.

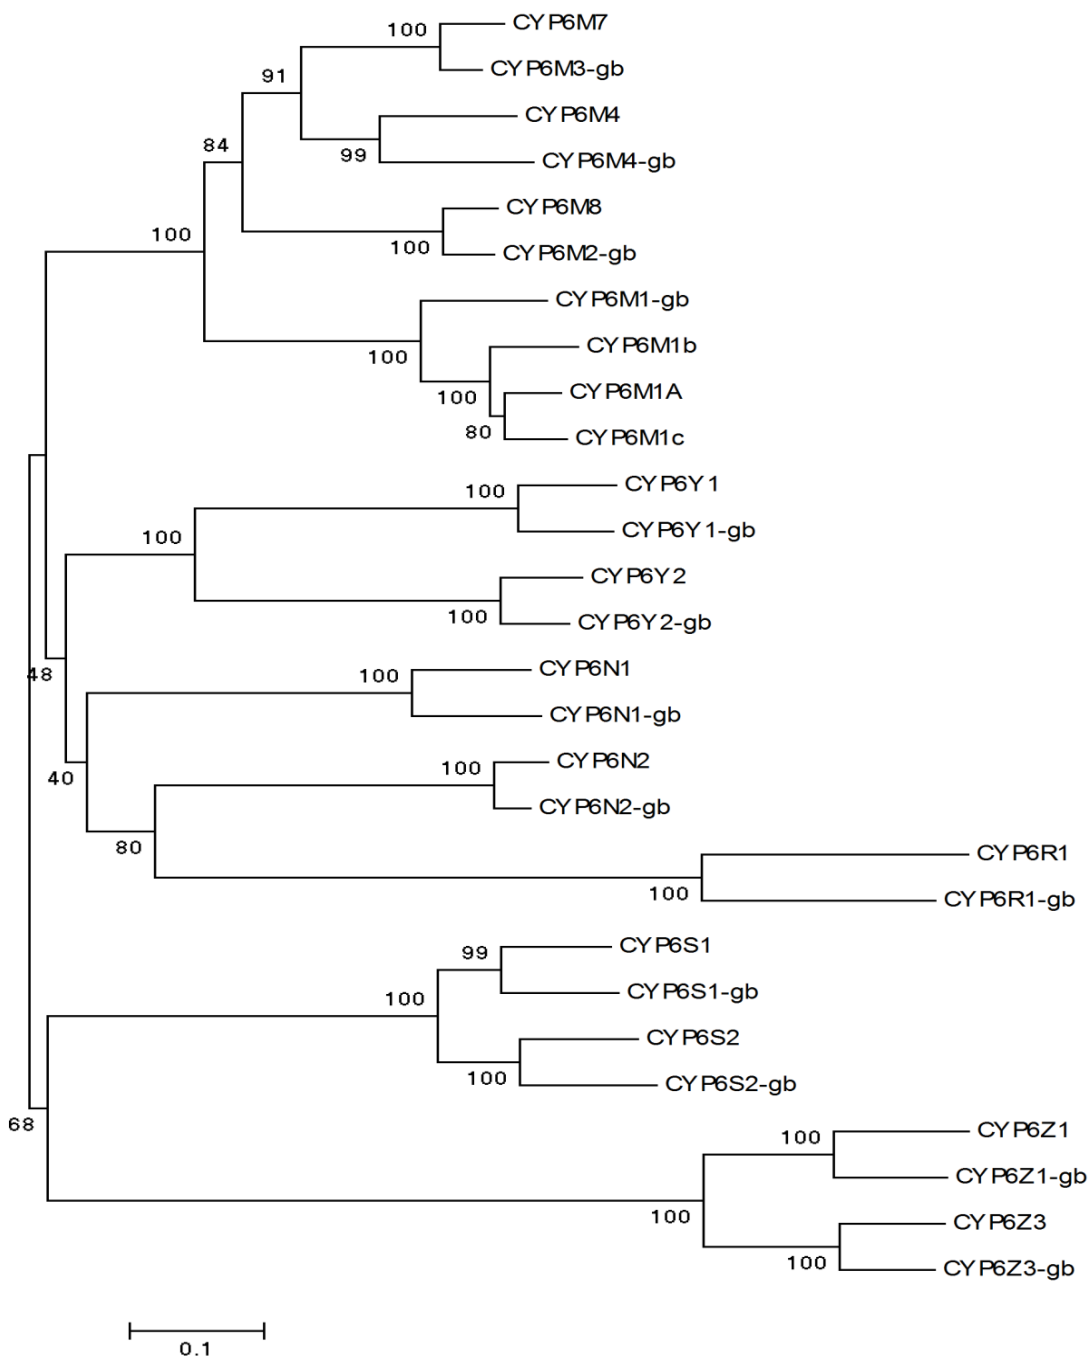

**Figure S2:** Neighbour joining tree showing the phylogeny of P450 genes from the sequenced BAC clone of *An. funestus* and orthologs in *An. gambiae*. The g letter beside a P450 indicates that it belongs to *An. gambiae*. Genes with a, b and c designation are copies of a triplication event from *CYP6M1* and have not yet been assigned individual gene names.



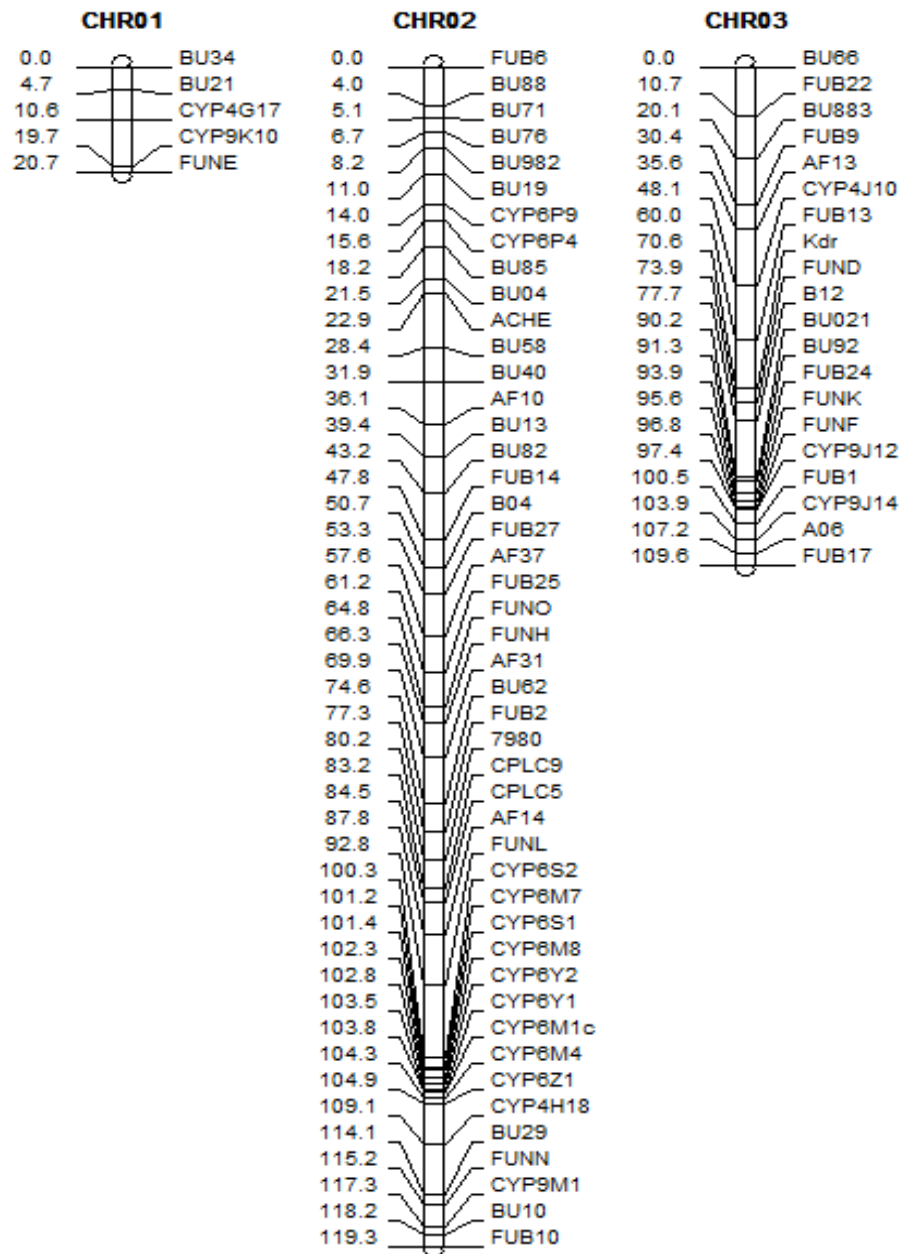

**Figure S4:** Combined Linkage map of Family 1 (♀susceptible x ♂resistant) and Family 10 (♀resistant x ♂susceptible).

|     |            |            |            |            |            |            |            |
|-----|------------|------------|------------|------------|------------|------------|------------|
|     | 10         | 20         | 30         | 40         | 50         | 60         | 70         |
| FG1 | MILYAIAVLP | VIVFLALKYV | YSYWDRHGIP | NLKPEIPYGN | LRILAEKKES | LNIAVNNLYA | RSTDRLVGVY |
| FG2 | MILYAIAVLP | VIVFLALKYV | YSYWDRHGIP | NLKPEIPYGN | LRILAEKKES | LNIAVNNLYT | RSTDRLVGVY |
| FG3 | MILYAIAVLP | VIVFLALKYV | YSYWDRHGIP | NLKPEIPYGN | LRILAEKKES | LNIAVNNLYS | RSTDRLVGVY |
| FG4 | MILYAIAVLP | VIVFLALKYV | YSYWDRHGIP | NLKPEIPYGN | LRILAEKKES | LNIAVNNLYS | RSTDRLVGVY |
| FZ1 | MILYAIAVLP | VIVFLALKYV | YSYWDRHGIP | NLKPEIPYGN | LRILAEKKES | LNIAVNNLYS | RSTDRLVGVY |
| FZ2 | MILYAIAVLP | VIVFLALKYV | YSYWDRHGIP | NLKPEIPYGN | LRILAEKKES | LNIAVNNLYT | RSTDRLVGVY |
| FZ4 | MILYAIAVLP | VIVFLALKYV | YSYWDRHGIP | NLKPEIPYGN | LRILAEKKES | LNIAVNNLYT | RSTDRLVGVY |
| FZ5 | MILYAIAVLP | VIVFLALKYV | YSYWDRHGIP | NLKPEIPYGN | LRILAEKKES | LNIAVNNLYT | RSTDRLVGVY |

|     |            |            |            |            |            |            |            |     |
|-----|------------|------------|------------|------------|------------|------------|------------|-----|
|     | 80         | 90         | 100        | SRS1       | 110        | 120        | 130        | 140 |
| FG1 | LFFRPAILIR | DAHLAKRIMV | NDFQHFHDRG | VYCNEHGDPM | SANLFALPGQ | RWKNLRGKLT | PTFTSGQLRN |     |
| FG2 | LFFRPAILIR | DAHLAKRIMV | NDFQHFHDRG | VYCNEHGDPM | SANLFALPGQ | RWKNLRGKLT | PTFTSGQLRN |     |
| FG3 | LFFRPAILIR | DAHLAKRIMV | NDFQHFHDRG | VYCNEHGDPM | SANLFALPGQ | RWKNLRGKLT | PTFTSGQLRN |     |
| FG4 | LFFRPAILIR | DAHLAKRIMV | NDFQHFHDRG | VYCNEHGDPM | SANLFALPGQ | RWKNLRGKLT | PTFTSGQLRN |     |
| FZ1 | LFFRPAILIR | DAHLAKRIMV | NDFQHFHDRG | VYCNEHGDPM | SANLFALPGQ | RWKNLRGKLT | PTFTSGQLRN |     |
| FZ2 | LFFRPAILIR | DAHLAKRIMV | NDFQHFHDRG | VYCNEHGDPM | SANLFALPGQ | RWKNLRGKLT | PTFTSGQLRN |     |
| FZ4 | LFFRPAILIR | DAHLAKRIMV | NDFQHFHDRG | VYCNEHGDPM | SANLFALPGQ | RWKNLRGKLT | PTFTSGQLRN |     |
| FZ5 | LFFRPAILIR | DAHLAKRIMV | NDFQHFHDRG | VYCNEHGDPM | SANLFALPGQ | RWKNLRGKLT | PTFTSGQLRN |     |

|     |            |            |            |            |           |            |            |
|-----|------------|------------|------------|------------|-----------|------------|------------|
|     | 150        | 160        | 170        | 180        | 190       | 200        | 210        |
| FG1 | MLPTFLDVGK | KLQQFLDNLA | MDHQIVNMRD | IVSRYVLDVV | ASVFFGFAN | CLHDPDDPFR | VALRDLTNPE |
| FG2 | MLPTFLDVGK | KLQQFLDNLA | MDHQIVNMRD | IVSRYVLDVV | ASVFFGFAN | CLHDPDDPFR | VALRDLTNPE |
| FG3 | MLPTFLDVGK | KLQQFLDNLA | MDHQIVNMRD | IVSRYVLDVV | ASVFFGFAN | CLHDPDDPFR | VALRDLTNPE |
| FG4 | MLPTFLDVGK | KLQQFLDNLA | MDHQIVNMRD | IVSRYVLDVV | ASVFFGFAN | CLHDPDDPFR | VALRDLTNPE |
| FZ1 | MLPTFLDVGK | KLQQFLDNLA | MDHQIVNMRD | IVSRYVLDVV | ASVFFGFAN | CLHDPDDPFR | VALRDLTNPE |
| FZ2 | MLPTFLDVGK | KLQQFLDNLA | MDHQIVNMRD | IVSRYVLDVV | ASVFFGFAN | CLHDPDDPFR | VALRDLTNPE |
| FZ4 | MLPTFLDVGK | KLQQFLDNLA | MDHQIVNMRD | IVSRYVLDVV | ASVFFGFAN | CLHDPDDPFR | VALRDLTNPE |
| FZ5 | MLPTFLDVGK | KLQQFLDNLA | MDHQIVNMRD | IVSRYVLDVV | ASVFFGFAN | CLHDPDDPFR | VALRDLTNPE |

|     |            |            |            |            |            |            |            |     |     |
|-----|------------|------------|------------|------------|------------|------------|------------|-----|-----|
|     | SRS2       | 220        | 230        | SRS3       | 240        | 250        | 260        | 270 | 280 |
| FG1 | SFLNNIRSAG | VFLCPGLLKF | TGISALAPAM | KKFTMEVISS | HLHQRETGQV | TRRDFIQMLT | DLRRKAGNNA |     |     |
| FG2 | SFLNNIRSAG | VFLCPGLLKF | TGISALAPAM | KKFTMEVISS | HLHQRETGQV | TRRDFIQMLT | DLRRKAGNNA |     |     |
| FG3 | SFLNNIRSAG | VFLCPGLLKF | TGISALAPAM | KKFTMEVISS | HLHQRETGQV | TRRDFIQMLT | DLRRKAGNNA |     |     |
| FG4 | SFLNNIRSAG | VFLCPGLLKF | TGISALAPAM | KKFTMEVISS | HLHQRETGQV | TRRDFIQMLT | DLRRKAGNNA |     |     |
| FZ1 | SFLNNIRSAG | VFLCPGLLKF | TGISALAPAM | KKFTMEVISS | HLHQRETGQV | TRRDFIQMLT | DLRRKAGNNA |     |     |
| FZ2 | SFLNNIRSAG | VFLCPGLLKF | TGISALAPAM | KKFTMEVISS | HLHQRETGQV | TRRDFIQMLT | DLRRKAGNNA |     |     |
| FZ4 | SFLNNIRSAG | VFLCPGLLKF | TGISALAPAM | KKFTMEVISS | HLHQRETGQV | TRRDFIQMLT | DLRRKAGNNA |     |     |
| FZ5 | SFLNNIRSAG | VFLCPGLLKF | TGISALAPAM | KKFTMEVISS | HLHQRETGQV | TRRDFIQMLT | DLRRKAGNNA |     |     |

|     |            |            |            |            |            |            |             |     |
|-----|------------|------------|------------|------------|------------|------------|-------------|-----|
|     | 290        | SRS4       | 300        | 310        | 320        | 330        | 340         | 350 |
| FG1 | EDSLSEAQCA | ANVFLFYAAG | ADTSTAATSF | TLHELTHNPE | VMGKVQREID | EMMNRYNGEI | TYDNI TELKY |     |
| FG2 | EDSLSEAQCA | ANVFLFYAAG | ADTSTAATSF | TLHELTHNPE | VMGKVQREID | EMMNRYNGEI | TYDNI TELKY |     |
| FG3 | EDSLSEAQCA | ANVFLFYAAG | ADTSTAATSF | TLHELTHNPE | VMGKVQREID | EMMNRYNGEI | TYDNI TELKY |     |
| FG4 | EDSLSEAQCA | ANVFLFYAAG | ADTSTAATSF | TLHELTHNPE | VMGKVQREID | EMMNRYNGEI | TYDNI TELKY |     |
| FZ1 | EDSLSEAQCA | ANVFLFYAAG | ADTSTAATSF | TLHELTHNPE | VMGKVQREID | EMMNRYNGEI | TYDNI TELKY |     |
| FZ2 | EDSLSEAQCA | ANVFLFYAAG | ADTSTAATSF | TLHELTHNPE | VMGKVQREID | EMMNRYNGEI | TYDNI TELKY |     |
| FZ4 | EDSLSEAQCA | ANVFLFYAAG | ADTSTAATSF | TLHELTHNPE | VMGKVQREID | EMMNRYNGEI | TYDNI TELKY |     |
| FZ5 | EDSLSEAQCA | ANVFLFYAAG | ADTSTAATSF | TLHELTHNPE | VMGKVQREID | EMMNRYNGEI | TYDNI TELKY |     |

|     |            |            |            |           |            |            |            |     |
|-----|------------|------------|------------|-----------|------------|------------|------------|-----|
|     | 360        | SRS5       | 370        | 380       | 390        | 400        | 410        | 420 |
| FG1 | LDMCIKETLR | MYPALAVLNR | ECTIDYRVPD | SDIIRKGTQ | VIIPLLGISM | NEKYFPNPEL | YSPERFDEAT |     |
| FG2 | LDMCIKETLR | MYPALAVLNR | ECTIDYRVPD | SDIIRKGTQ | VIIPLLGISM | NEKYFPNPEL | YSPERFDEAT |     |
| FG3 | LDMCIKETLR | MYPALAVLNR | ECTIDYRVPD | SDIIRKGTQ | VIIPLLGISM | NEKYFPNPEL | YSPERFDEAT |     |
| FG4 | LDMCIKETLR | MYPALAVLNR | ECTIDYRVPD | SDIIRKGTQ | VIIPLLGISM | NEKYFPNPEL | YSPERFDEAT |     |

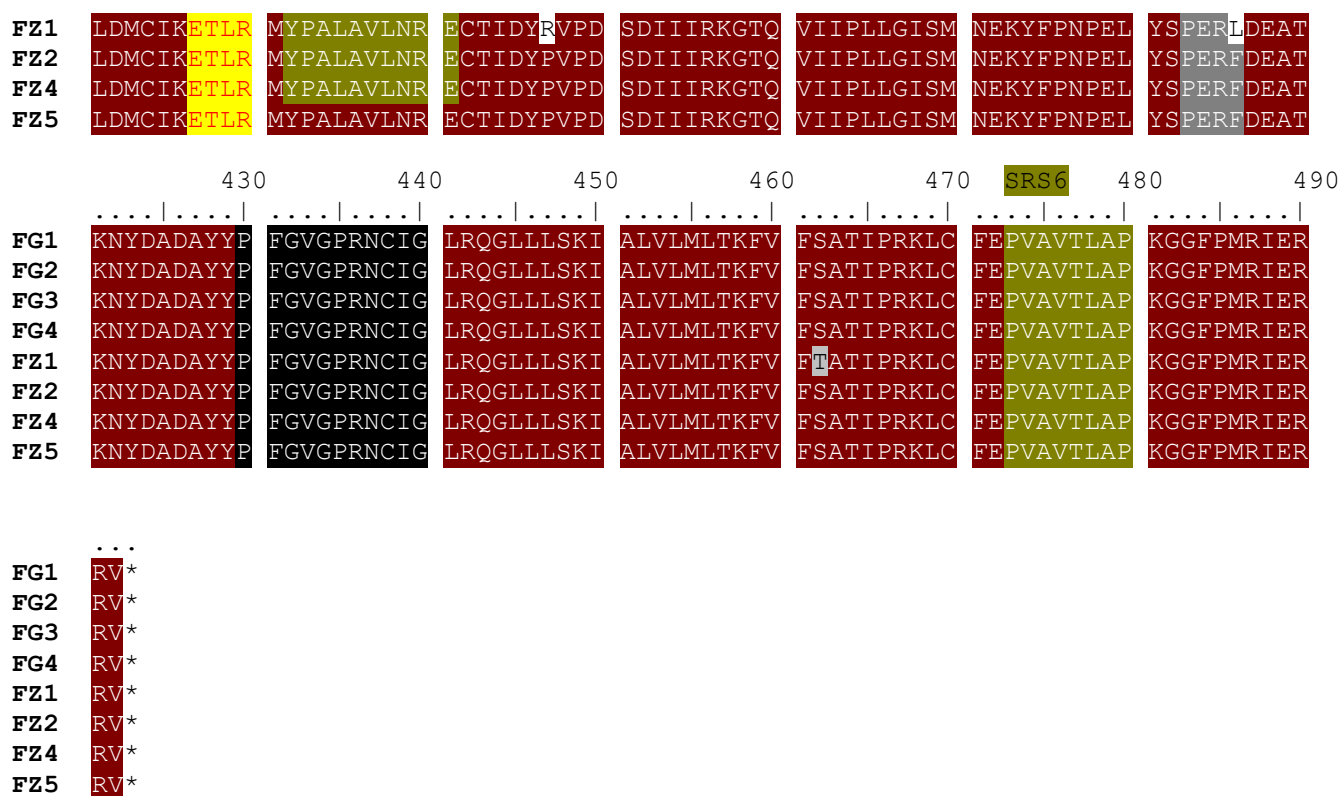

**Figure S5:** Alignment of the amino acid sequences of CYP6Z1 between FANG and FUMOS-R strains. Conserved regions are highlighted as in Figure S1. Substrate recognition sites (SRS) are deduced from the *An. gambiae* model (Chiu et al 2008).



|     | 10         | 20         | 30         | 40         | 50         | 60        | 70         |
|-----|------------|------------|------------|------------|------------|-----------|------------|
| FG3 | MFVYTLALFF | IAIFLLLRYS | YSHWERHGLE | HVKPEIPYCN | LRTVVEKKES | FGIANNLYH | RSSDRLLGVY |
| FG4 | MFVYTLALFF | IAIFLLLRYS | YSHWERHGLE | HVKPEIPYCN | LRTVVEKKES | FGIANNLYH | RSSDRLLGVY |
| FG5 | MFVYTLALFF | IAIFLLLRYS | YSHWERHGLE | HVKPEIPYCN | LRTVVEKKES | FGIANNLYH | RSSDRLLGVY |
| FG1 | MFVYTLALFF | IAIFLLLRYS | YSHWERHGLE | HVKPEIPYCN | LRTVVEKKES | FGIANNLYH | RSSDRLLGVY |
| FG2 | MFVYTLALFF | IAIFLLLRYS | YSHWERYGLE | HVKPEIPYCN | LRTVVEKKES | FGIANNLYH | RSSDRLLGVY |
| FZ1 | MFVYTLALFF | IAIFLLLRYS | YSHWERYGLE | HVKPEIPYCN | LRTVVEKKES | FGIANNLYH | RSSDRLLGVY |
| FZ2 | MFVYTLALFF | IAIFLLLRYS | YSHWERYGLE | HVKPEIPYCN | LRTVVEKKES | FGIANNLYH | RSSDRLLGVY |
| FZ3 | MFVYTLALFF | IAIFLLLRYS | YSHWERYGLE | HVKPEIPYCN | LRTVVEKKES | FGIANNLYH | RSSDRLLGVY |
| FZ4 | MFVYTLALFF | IAIFLLLRYS | YSHWERYGLE | HVKPEIPYCN | LRTVVEKKES | FGIANNLYH | RSSDRLLGVY |
| FZ5 | MFVYTLALFF | IAIFLLLRYS | YSHWERYGLE | HVKPEIPYCN | LRTVVEKKES | FGIANNLYH | RSSDRLLGVY |
| FZ6 | MFVYTLALFF | IAIFLLLRYS | YSHWERYGLE | HVKPEIPYCN | LRTVVEKKES | FGIANNLYH | RSSDRLLGVY |

|     | 80         | 90         | 100        | SRS1       | 110        | 120        | 130        | 140 |
|-----|------------|------------|------------|------------|------------|------------|------------|-----|
| FG3 | LFFRPAILIR | DPQLAKRIMV | NDFQHFHDRG | VYCNEKGDPE | SANLFALSGD | RWKNLRAKLT | PTFTSGQLRN |     |
| FG4 | LFFRPAILIR | DPQLAKRIMV | NDFQHFHDRG | VYCNEKGDPE | SANLFALSGD | RWKNLRAKLT | PTFTSGQLRN |     |
| FG5 | LFFRPAILIR | DPQLAKRIMV | NDFQHFHDRG | VYCNEKGDPE | SANLFALSGD | RWKNLRAKLT | PTFTSGQLRN |     |
| FG1 | LFFRPAILIR | DPQLAKRIMV | NDFQHFHDRG | VYCNEKGDPE | SANLFALSGD | RWKNLRAKLT | PTFTSGQLRN |     |
| FG2 | LFFRPAILIR | DPQLAKRIMV | NDFQHFHDRG | VYCNEKGDPE | SANLFALSGD | RWKNLRAKLT | PTFTSGQLRN |     |
| FZ1 | LFFRPAILIR | DPQLAKRIMV | NDFQHFHDRG | VYCNEKGDPE | SANLFALSGD | RWKNLRAKLT | PTFTSGQLRN |     |
| FZ2 | LFFRPAILIR | DPQLAKRIMV | NDFQHFHDRG | VYCNEKGDPE | SANLFALSGD | RWKNLRAKLT | PTFTSGQLRN |     |
| FZ3 | LFFRPAILIR | DPQLAKRIMV | NDFQHFHDRG | VYCNEKGDPE | SANLFALSGD | RWKNLRAKLT | PTFTSGQLRN |     |
| FZ4 | LFFRPAILIR | DPQLAKRIMV | NDFQHFHDRG | VYCNEKGDPE | SANLFALSGD | RWKNLRAKLT | PTFTSGQLRN |     |
| FZ5 | LFFRPAILIR | DPQLAKRIMV | NDFQHFHDRG | VYCNEKGDPE | SANLFALSGD | RWKNLRAKLT | PTFTSGQLRN |     |
| FZ6 | LFFRPAILIR | DPQLAKRIMV | NDFQHFHDRG | VYCNEKGDPE | SANLFALSGD | RWKNLRAKLT | PTFTSGQLRN |     |

|     | 150        | 160        | 170        | 180        | 190       | 200        | SRS2       | 210 |
|-----|------------|------------|------------|------------|-----------|------------|------------|-----|
| FG3 | MLPTLIDVGS | KLNDRMNTLA | DEKTVVDMRD | IASRFVLDTI | ASVFFGFAN | CIHNSDDPFL | KTLLQVNKRR |     |
| FG4 | MLPTLIDVGS | KLNDRMNTLA | DEKTVVDMRD | IASRFVLDTI | ASVFFGFAN | CIHNSDDPFL | KTLLQVNKRR |     |
| FG5 | MLPTLIDVGS | KLNDRMNTLA | DEKTVVDMRD | IASRFVLDTI | ASVFFGFAN | CIHNSDDPFL | KTLLQVNKRR |     |
| FG1 | MLPTLIDVGS | KLNDRMNTLA | DEKTVVDMRD | IASRFVLDTI | ASVFFGFAN | CIHNSDDPFL | KTLLQVNKRR |     |
| FG2 | MLPTLIDVGS | KLNDRMNTLA | DEKTVVDMRD | IASRFVLDTI | ASVFFGFAN | CIHNSDDPFL | KTLLQVNKRR |     |
| FZ1 | MLPTLIDVGS | KLNDRMNTLA | DEKTVVDMRD | IASRFVLDTI | ASVFFGFAN | CIHNSDDPFL | KTLLQVNKRR |     |
| FZ2 | MLPTLIDVGS | KLNDRMNTLA | DEKTVVDMRD | IASRFVLDTI | ASVFFGFAN | CIHNSDDPFL | KTLLQVNKRR |     |
| FZ3 | MLPTLIDVGS | KLNDRMNTLA | DEKTVVDMRD | IASRFVLDTI | ASVFFGFAN | CIHNSDDPFL | KTLLQVNKRR |     |
| FZ4 | MLPTLIDVGS | KLNDRMNTLA | DEKTVVDMRD | IASRFVLDTI | ASVFFGFAN | CIHNSDDPFL | KTLLQVNKRR |     |
| FZ5 | MLPTLIDVGS | KLNDRMNTLA | DEKTVVDMRD | IASRFVLDTI | ASVFFGFAN | CIHNSDDPFL | KTLLQVNKRR |     |
| FZ6 | MLPTLIDVGS | KLNDRMNTLA | DEKTVVDMRD | IASRFVLDTI | ASVFFGFAN | CIHNSDDPFL | KTLLQVNKRR |     |

|     | 220        | 230        | SRS3       | 240        | 250        | 260        | 270        | 280 |
|-----|------------|------------|------------|------------|------------|------------|------------|-----|
| FG3 | SFVDNIRTSG | VFICPGLLKL | TGLTSLPTEL | INFVMEIITH | QIDHREKNQI | SRKDFVQLLI | DLRRDASSQG |     |
| FG4 | SFVDNIRTSG | VFICPGLLKL | TGLTSLPTEL | INFVMEIITH | QIDHREKNQI | SRKDFVQLLI | DLRRDASSQG |     |
| FG5 | SFVDNIRTSG | VFICPGLLKL | TGLTSLPTEL | INFVMEIITH | QIDHREKNQI | SRKDFVQLLI | DLRRDASSQG |     |
| FG1 | SFVDNIRTSG | VFICPGLLKL | TGLTSLPTEL | INFVMEIITH | QIDHREKNQI | SRKDFVQLLI | DLRRDASSQG |     |
| FG2 | SFVDNIRTSG | VFICPGLLKL | TGLTSLPTEL | INFVMEIITH | QIDHREKNQI | SRKDFVQLLI | DLRRDASSQG |     |
| FZ1 | SFVDNIRTSG | VFICPGLLKL | TGLTSLPTEL | INFVMEIITH | QIDHREKNQI | SRKDFVQLLI | DLRRDASSQG |     |
| FZ2 | SFVDNIRTSG | VFICPGLLKL | TGLTSLPTEL | INFVMEIITH | QIDHREKNQI | SRKDFVQLLI | DLRRDASSQG |     |
| FZ3 | SFVDNIRTSG | VFICPGLLKL | TGLTSLPTEL | INFVMEIITH | QIDHREKNQI | SRKDFVQLLI | DLRRDASSQG |     |
| FZ4 | SFVDNIRTSG | VFICPGLLKL | TGLTSLPTEL | INFVMEIITH | QIDHREKNQI | SRKDFVQLLI | DLRRDASSQG |     |
| FZ5 | SFVDNIRTSG | VFICPGLLKL | TGLTSLPTEL | INFVMEIITH | QIDHREKNQI | SRKDFVQLLI | DLRRDASSQG |     |
| FZ6 | SFVDNIRTSG | VFICPGLLKL | TGLTSLPTEL | INFVMEIITH | QIDHREKNQI | SRKDFVQLLI | DLRRDASSQG |     |

|     | 290        | SRS4       | 300        | 310        | 320        | 330        | 340        | 350 |
|-----|------------|------------|------------|------------|------------|------------|------------|-----|
| FG3 | EQALSIEQCA | ANVFLFYIAG | SETSTAATSF | TLHELSHNPD | ALAKLQQEID | EMMERHNGEI | TYENINELKY |     |
| FG4 | EQALSIEQCA | ANVFLFYIAG | SETSTAATSF | TLHELSHNPD | ALAKLQQEID | EMMERHNGEI | TYENINELKY |     |
| FG5 | EQALSIEQCA | ANVFLFYIAG | SETSTAATSF | TLHELSHNPD | ALAKLQQEID | EMMERHNGEI | TYENINELKY |     |
| FG1 | EQALSIEQCA | ANVFLFYIAG | SETSTAATSF | TLHELSHNPD | ALAKLQQEID | EMMERHNGEI | TYENINELKY |     |
| FG2 | EQALSIEQCA | ANVFLFYIAG | SETSTAATSF | TLHELSHNPD | ALAKLQQEID | EMMERHNGEI | TYENINELKY |     |
| FZ1 | EQALSIEQCA | ANVFLFYIAG | SETSTAATSF | TLHELSHNPD | ALAKLQQEID | EMMERHNGEI | TYENINELKY |     |

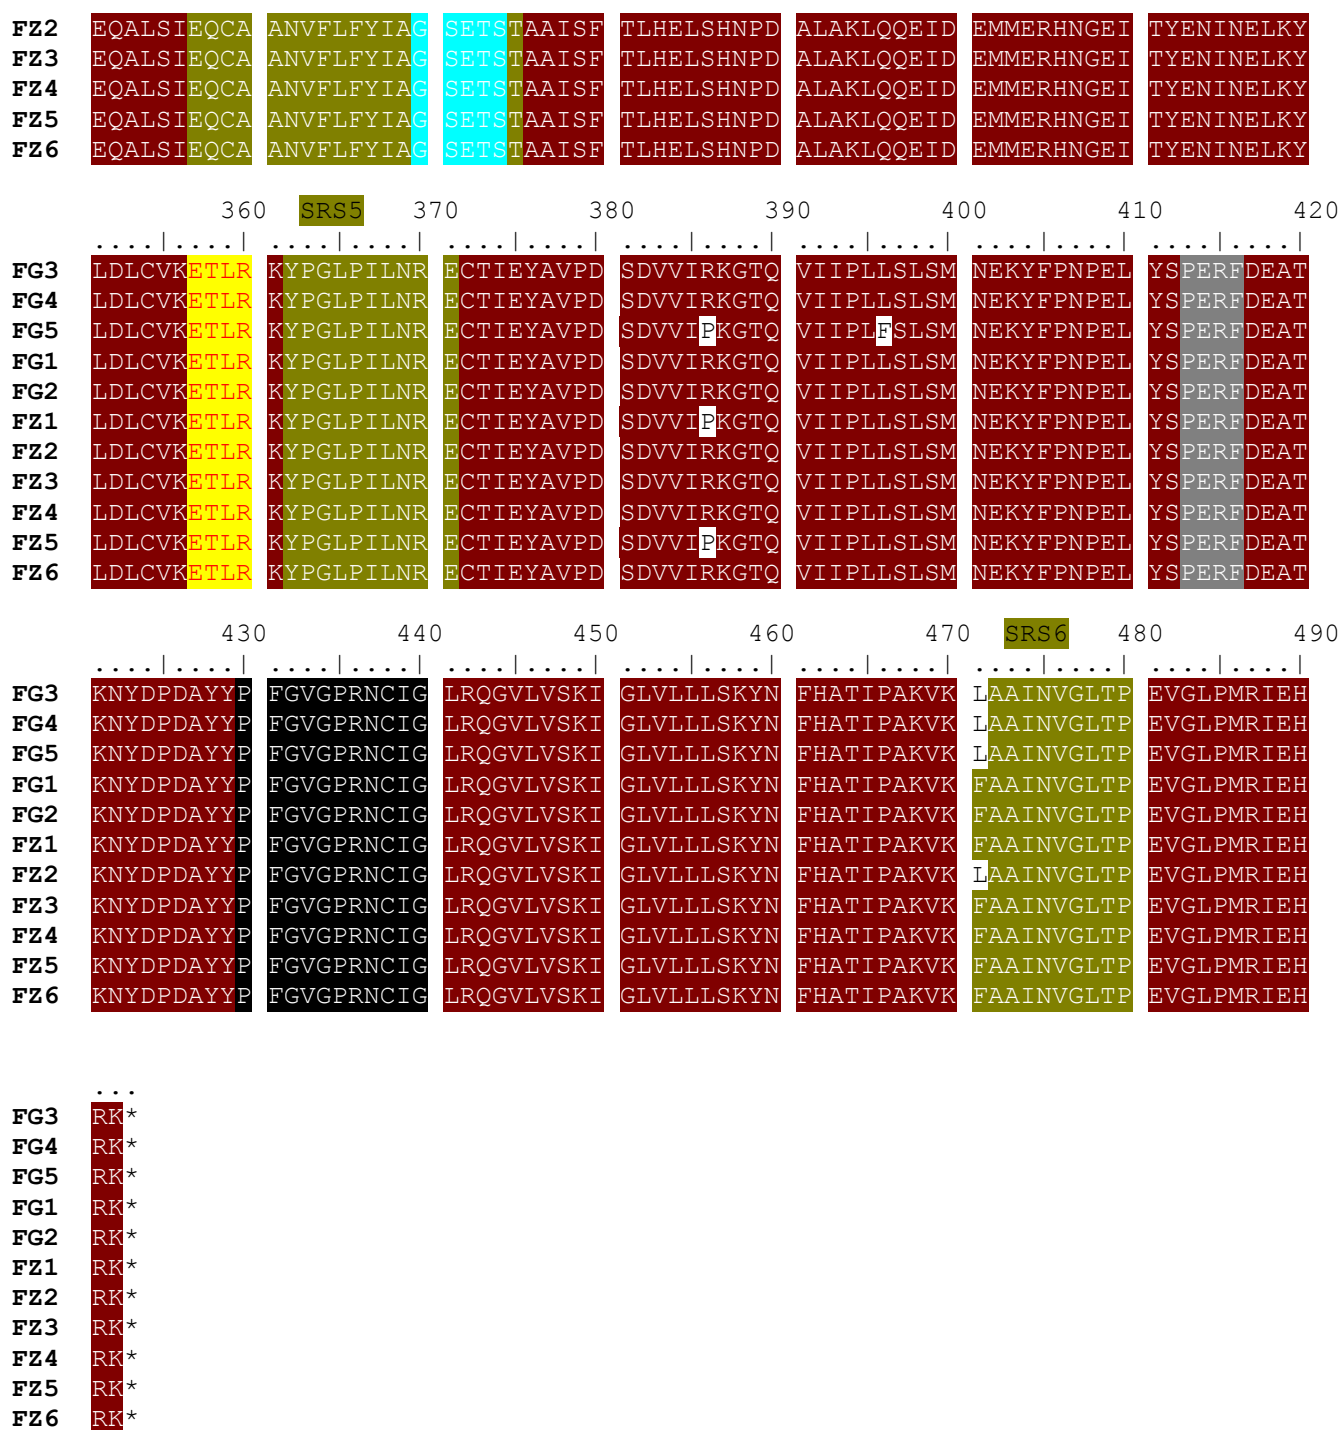

**Figure S6:** Alignment of the amino acid sequences of CYP6Z3 between FANG and FUMOS-R strains.

Substrate recognition sites (SRS) are deduced from the *An. gambiae* model (Chiu et al 2008).
